# Supplementary material for: A Systematic Review and Meta-Analysis of the Impact of Mindfulness Based Interventions on Heart Rate Variability and Inflammatory Markers
Source: PubMed Central journal article supplement (PMC6833066; doi:10.3390/jcm8101638), 2019-10-07
Supplement: jcm-08-01638-s001.pdf [file jcm-08-01638-s001.pdf]

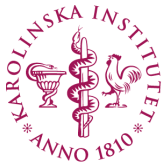

## Documentation of search strategies University Library search consultation group

---

Date: November 2017

Topic/research question: The effects of Mindfulness Based Stress Reduction and Mindfulness based Cognitive Therapy on biological and physiological markers

Name of researcher(s): Anna Sidorchuk & Maria Niemi, Department of Public Health Sciences, Karolinska Institutet

Librarian(s): Carl Gornitzki & Klas Moberg, University Library

---

### Databases:

1. Medline (Ovid)
2. PsycInfo (Ovid)
3. Web of Science
4. Cinahl (Ebsco)
5. Embase (embase.com)
6. PubMed (NOT medline[sb])

### Grey Literature:

1. ProQuest Dissertations and Theses = 143
  2. ClinicalTrials.gov = 974
- 

### Total number of hits:

- Before deduplication: 3,501 (not including grey literature)
  - After deduplication: 2,324 (not including grey literature)
- 

### Comments:

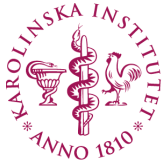

## 1. Medline (Ovid)

Date of Search: 2017-11-09

Field tags:

- .ti,ab,kf = title, abstract & keyword
- exp/ = MeSH, exploded
- adj3 = within three words

### MINDFULNESS

1. Mindfulness/
2. Meditation/
3. Mind-Body Therapies/
4. (mindfulness or meditat\* or mbsr or mbct).ti,ab,kf.
5. or/1-4

### BIOLOGICAL AND PHYSIOLOGICAL MARKERS

6. exp Cytokines/
7. exp Biomarkers/
8. exp Neuropeptides/
9. exp C-Reactive Protein/
10. exp Heart Rate/
11. exp Autonomic Nervous System/
12. exp Vagus Nerve/
13. exp Insulin-Like Growth Factor I/
14. exp Stress, Physiological/
15. (cytokine\* or interleukin\* or biological marker\* or biomarker\* or neuropeptide\* or c-reactive protein\* or crp or variability or autonom\* nervous system or ans or vagal activity or vagus activity or insulin-growth factor\* or insulin-like growth factor\* or physiological stress or physiological activit\*).ti,ab,kf.
16. (((heart or puls\*) adj3 (beat\* or rate\*)) or (heartrate\* or heartbeat\*)).ti,ab,kf.
17. or/6-16
18. 5 and 17
19. remove duplicates from 18



## 2. PsycInfo (Ovid)

Date of Search: 2017-11-09

1. Mindfulness/
2. Meditation/
3. Mind Body Therapy/
4. (mindfulness or meditat\* or mbsr or mbct).ti,ab,id.
5. or/1-4
  
6. exp Cytokines/
7. Biological Markers/
8. exp Neuropeptides/
9. Heart Rate/
10. exp Autonomic Nervous System/
11. Vagus Nerve/
12. Insulin-like Growth Factor/
13. Physiological Stress/
14. (cytokine\* or interleukin\* or biological marker\* or biomarker\* or neuropeptide\* or c-reactive protein\* or crp or variability or autonom\* nervous system or ans or vagal activity or vagus activity or insulin-growth factor\* or insulin-like growth factor\* or physiological stress or physiological activit\*).ti,ab,id.
15. (((heart or puls\*) adj3 (beat\* or rate\*)) or (heartrate\* or heartbeat\*)).ti,ab,id.
16. or/6-15
  
17. 5 and 16

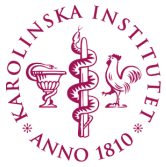

### 3. Web of Science

|                                                                                                                                                                                                                                                                                                                                                                                                                                                                                          |                                                                                                     |
|------------------------------------------------------------------------------------------------------------------------------------------------------------------------------------------------------------------------------------------------------------------------------------------------------------------------------------------------------------------------------------------------------------------------------------------------------------------------------------------|-----------------------------------------------------------------------------------------------------|
| Date of Search: 2017-11-09                                                                                                                                                                                                                                                                                                                                                                                                                                                               | Field tags: <ul style="list-style-type: none"><li>• TS = Topic: title, abstract, keywords</li></ul> |
| <p>TS=(mindfulness OR meditat* OR mbsr OR mbct)</p> <p>AND</p> <p>TS=(cytokine* OR interleukin* OR "biological marker*" OR biomarker* OR neuropeptide* OR c-reactive protein* OR crp OR variability OR "autonom* nervous system" OR ans OR "vagal activity" OR "vagus activity" OR "insulin-growth factor*" OR "insulin-like growth factor*" OR "physiological stress" OR "physiological activit*") OR TS((((heart OR puls*) NEAR/3 (beat* OR rate*)) OR (heartrate* OR heartbeat*))</p> |                                                                                                     |

#### 4. Cinahl (Ebsco)

|                            |                                                                                                                                                                                                                                                                                                                                                                                                                                                                                                                                                                                                                                                                                  |                                                                        |
|----------------------------|----------------------------------------------------------------------------------------------------------------------------------------------------------------------------------------------------------------------------------------------------------------------------------------------------------------------------------------------------------------------------------------------------------------------------------------------------------------------------------------------------------------------------------------------------------------------------------------------------------------------------------------------------------------------------------|------------------------------------------------------------------------|
| Date of Search: 2017-11-09 |                                                                                                                                                                                                                                                                                                                                                                                                                                                                                                                                                                                                                                                                                  | Field tags:                                                            |
|                            |                                                                                                                                                                                                                                                                                                                                                                                                                                                                                                                                                                                                                                                                                  | <ul style="list-style-type: none"> <li>MH = Cinahl Headings</li> </ul> |
| S17                        | S5 AND S16                                                                                                                                                                                                                                                                                                                                                                                                                                                                                                                                                                                                                                                                       |                                                                        |
| S16                        | S6 OR S7 OR S8 OR S9 OR S10 OR S11 OR S12 OR S13 OR S14 OR S15                                                                                                                                                                                                                                                                                                                                                                                                                                                                                                                                                                                                                   |                                                                        |
| S15                        | TI ( (((heart OR puls*) N3 (beat* OR rate*)) OR (heartrate* OR heartbeat*)) ) OR AB ( (((heart OR puls*) N3 (beat* OR rate*)) OR (heartrate* OR heartbeat*)) ) )                                                                                                                                                                                                                                                                                                                                                                                                                                                                                                                 |                                                                        |
| S14                        | TI ( (cytokine* OR interleukin* OR "biological marker*" OR biomarker* OR neuropeptide* OR c-reactive protein* OR crp OR variability OR "autonom* nervous system" OR ans OR "vagal activity" OR "vagus activity" OR "insulin-growth factor*" OR "insulin-like growth factor*" OR "physiological stress" OR "physiological activit*") ) OR AB ( (cytokine* OR interleukin* OR "biological marker*" OR biomarker* OR neuropeptide* OR c-reactive protein* OR crp OR variability OR "autonom* nervous system" OR ans OR "vagal activity" OR "vagus activity" OR "insulin-growth factor*" OR "insulin-like growth factor*" OR "physiological stress" OR "physiological activit*") ) ) |                                                                        |
| S13                        | (MH "Stress, Physiological")                                                                                                                                                                                                                                                                                                                                                                                                                                                                                                                                                                                                                                                     |                                                                        |
| S12                        | (MH "Vagus Nerve+")                                                                                                                                                                                                                                                                                                                                                                                                                                                                                                                                                                                                                                                              |                                                                        |
| S11                        | (MH "Autonomic Nervous System+")                                                                                                                                                                                                                                                                                                                                                                                                                                                                                                                                                                                                                                                 |                                                                        |
| S10                        | (MH "Heart Rate+")                                                                                                                                                                                                                                                                                                                                                                                                                                                                                                                                                                                                                                                               |                                                                        |
| S9                         | (MH "C-Reactive Protein")                                                                                                                                                                                                                                                                                                                                                                                                                                                                                                                                                                                                                                                        |                                                                        |

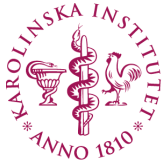

|    |                                                                                                      |
|----|------------------------------------------------------------------------------------------------------|
| S8 | (MH "Neuropeptides+")                                                                                |
| S7 | (MH "Biological Markers+")                                                                           |
| S6 | (MH "Cytokines+")                                                                                    |
| S5 | S1 OR S2 OR S3 OR S4                                                                                 |
| S4 | TI ( (mindfulness or meditat* or mbsr or mbct) ) OR AB ( (mindfulness or meditat* or mbsr or mbct) ) |
| S3 | (MH "Mind Body Techniques")                                                                          |
| S2 | (MH "Meditation")                                                                                    |
| S1 | (MH "Mindfulness")                                                                                   |



## 5. Embase (embase.com)

| Date of Search: 2017-11-09 |                                                                                                                                                                                                                                                                                                                                                                                                                                          | Field tags:                                                                                                                                                |           |
|----------------------------|------------------------------------------------------------------------------------------------------------------------------------------------------------------------------------------------------------------------------------------------------------------------------------------------------------------------------------------------------------------------------------------------------------------------------------------|------------------------------------------------------------------------------------------------------------------------------------------------------------|-----------|
|                            |                                                                                                                                                                                                                                                                                                                                                                                                                                          | <ul style="list-style-type: none"> <li>• :ab,ti = title &amp; abstract</li> <li>• /exp = Emtree, exploded</li> <li>• /de = Emtree, non-exploded</li> </ul> |           |
| No.                        | Query                                                                                                                                                                                                                                                                                                                                                                                                                                    |                                                                                                                                                            | Results   |
|                            |                                                                                                                                                                                                                                                                                                                                                                                                                                          |                                                                                                                                                            | 990       |
| #17                        | #4 AND #16                                                                                                                                                                                                                                                                                                                                                                                                                               |                                                                                                                                                            | 2,333,547 |
| #16                        | #5 OR #6 OR #7 OR #8 OR #9 OR #10 OR #11 OR #12 OR #13 OR #14 OR #15                                                                                                                                                                                                                                                                                                                                                                     |                                                                                                                                                            | 199,113   |
| #15                        | ((heart OR puls*) NEAR/3 (beat* OR rate*)):ab,ti OR heartrate*:ab,ti OR heartbeat*:ab,ti                                                                                                                                                                                                                                                                                                                                                 |                                                                                                                                                            | 608,127   |
| #14                        | cytokine*:ab,ti OR interleukin*:ab,ti OR 'biological marker*':ab,ti OR biomarker*:ab,ti OR neuropeptide*:ab,ti OR 'c reactive':ab,ti AND protein*:ab,ti OR crp:ab,ti OR variability:ab,ti OR 'autonom* nervous system':ab,ti OR ans:ab,ti OR 'vagal activity':ab,ti OR 'vagus activity':ab,ti OR 'insulin-growth factor*':ab,ti OR 'insulin-like growth factor*':ab,ti OR 'physiological stress':ab,ti OR 'physiological activit*':ab,ti |                                                                                                                                                            | 12,232    |
| #13                        | 'physiological stress'/de                                                                                                                                                                                                                                                                                                                                                                                                                |                                                                                                                                                            | 43,461    |
| #12                        | 'somatomedin c'/de                                                                                                                                                                                                                                                                                                                                                                                                                       |                                                                                                                                                            | 20,174    |
| #11                        | 'vagus nerve'/de                                                                                                                                                                                                                                                                                                                                                                                                                         |                                                                                                                                                            | 240,375   |
| #10                        | 'autonomic nervous system'/exp                                                                                                                                                                                                                                                                                                                                                                                                           |                                                                                                                                                            | 204,453   |
| #9                         | 'heart rate'/exp                                                                                                                                                                                                                                                                                                                                                                                                                         |                                                                                                                                                            | 110,290   |
| #8                         | 'c reactive protein'/de                                                                                                                                                                                                                                                                                                                                                                                                                  |                                                                                                                                                            |           |



|    |                                                                 |           |
|----|-----------------------------------------------------------------|-----------|
| #7 | 'neuropeptide'/exp                                              | 171,297   |
| #6 | 'biological marker'/de                                          | 171,785   |
| #5 | 'cytokine'/exp                                                  | 1,146,517 |
| #4 | #1 OR #2 OR #3                                                  | 10,057    |
| #3 | mindfulness:ab,ti OR meditat*:ab,ti OR mbsr:ab,ti OR mbct:ab,ti | 8,107     |
| #2 | 'meditation'/de                                                 | 4,823     |
|    | 'mindfulness'/de                                                | 1,945     |





## 5. PubMed (NOT medline[sb])

Date of Search: 2017-11-09

```
(((((heart[Title/Abstract] OR puls*[Title/Abstract])) AND (beat*[Title/Abstract] OR rate*[Title/Abstract]))) OR  
((cytokine*[Title/Abstract] OR interleukin*[Title/Abstract] OR "biological marker"[Title/Abstract] OR  
biomarker*[Title/Abstract] OR neuropeptide*[Title/Abstract] OR c-reactive protein*[Title/Abstract] OR  
crp[Title/Abstract] OR variability[Title/Abstract] OR "autonomic nervous system"[Title/Abstract] OR  
ans[Title/Abstract] OR "vagal activity"[Title/Abstract] OR "vagus activity"[Title/Abstract] OR "insulin-growth  
factors"[Title/Abstract] OR "insulin-like growth factors"[Title/Abstract] OR "insulin-growth  
factor"[Title/Abstract] OR "insulin-like growth factor"[Title/Abstract] OR "physiological stress"[Title/Abstract]  
OR "physiological activit*[Title/Abstract] OR heartrate*[Title/Abstract] OR heartbeat*[Title/Abstract])))
```

AND

```
((mindfulness[Title/Abstract] OR meditat*[Title/Abstract] OR mbsr[Title/Abstract] OR mbct[Title/Abstract]))
```

NOT

```
medline[sb]
```
